# Supplementary material for: Asymmetric addition of pyridine to 1,4-bis(ethynyl)bicyclo[2.2.2]octane: dissymmetrical rotator ligands illustrated in dpppPt(ii) and [Re6Se8]2+ complexes and an amphidynamic hydrogen bonded framework solid
Source: Royal Society of Chemistry journal article supplement (doi:10.1039/c1dt10913h), 2011-01-01
Supplement: c1dt10913h.pdf [file c1dt10913h.pdf]

## Electronic Supplementary Information (ESI)

Asymmetric addition of pyridine to 1,4-ethynylbicyclo[2.2.2]octane: dissymmetrical rotator ligands illustrated in *dppp*Pt(II) and  $[\text{Re}_6\text{Se}_8]^{2+}$  complexes and an amphidynamic hydrogen bonded framework solid

Cyprien Lemouchi,<sup>a</sup> Anne-Lise Barrès,<sup>a</sup> Cécile Mézière,<sup>a</sup> David Rondeau,<sup>a,d</sup> Leokadiya Zorina,<sup>a,b</sup> Pawel Wzietek<sup>c</sup> and Patrick Batail<sup>\*a</sup>

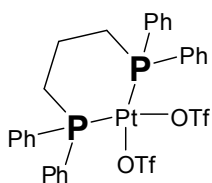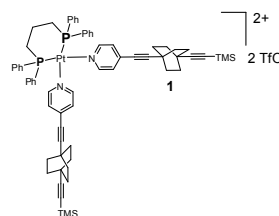

**Scheme S1.** <sup>31</sup>P NMR spectra at 300 MHz in CD<sub>3</sub>CN of *dppp*Pt(II)(OTf)<sub>2</sub> and *dppp*Pt(II)[ $\mu$ -**1**]<sub>2</sub>(OTf)<sub>2</sub>, **4**.

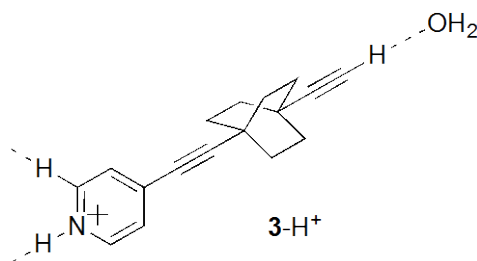

**Scheme S2.** The three hydrogen bond donor functionalities anchoring **3-H<sup>+</sup>** in [**3-H<sup>+</sup>**]<sub>2</sub>[OH<sub>2</sub>]<sub>2</sub>[Pt(CN)<sub>4</sub>]<sup>2-</sup>.
